# Supplementary material
Source: PubMed Central journal article supplement (PMC8079840)
Supplement: 11684_2021_853_MOESM1_ESM.pdf [file 11684_2021_853_MOESM1_ESM.pdf]

Supplementary data for

## **Effects of Shuanghuanglian oral liquids on patients with COVID-19: a randomized, open-label, parallel-controlled, multicenter clinical trial**

Li Ni<sup>1,\*</sup>, Zheng Wen<sup>1,\*</sup>, Xiaowen Hu<sup>2,\*</sup>, Wei Tang<sup>3,\*</sup>, Haisheng Wang<sup>4,\*</sup>, Ling Zhou<sup>1</sup>, Lujin Wu<sup>1</sup>, Hong Wang<sup>1</sup>, Chang Xu<sup>1</sup>, Xizhen Xu<sup>1</sup>, Zhichao Xiao<sup>1</sup>, Zongzhe Li<sup>1</sup>, Chenze Li<sup>1</sup>, Yujian Liu<sup>1</sup>, Jialin Duan<sup>1</sup>, Chen Chen<sup>1</sup>, Dan Li<sup>1</sup>, Runhua Zhang<sup>1</sup>, Jinliang Li<sup>5</sup>, Yongxiang Yi<sup>6</sup>, Wei Huang<sup>1,7</sup>, Yanyan Chen<sup>8</sup>, Jianping Zhao<sup>9</sup>, Jianping Zuo (✉)<sup>3</sup>, Jianping Weng (✉)<sup>2</sup>, Hualiang Jiang (✉)<sup>3,10</sup>, Dao Wen Wang (✉)<sup>1</sup>

Correspondence: Dao Wen Wang, [dwwang@tjh.tjmu.edu.cn](mailto:dwwang@tjh.tjmu.edu.cn); Hualiang Jiang, [hljiang@simm.ac.cn](mailto:hljiang@simm.ac.cn); Jianping Weng, [wengjp@ustc.edu.cn](mailto:wengjp@ustc.edu.cn); Jianping Zuo, [jpzuo@simm.ac.cn](mailto:jpzuo@simm.ac.cn)

### **This file includes:**

Supplementary Figures 1 and 2

Supplementary Tables 1–7

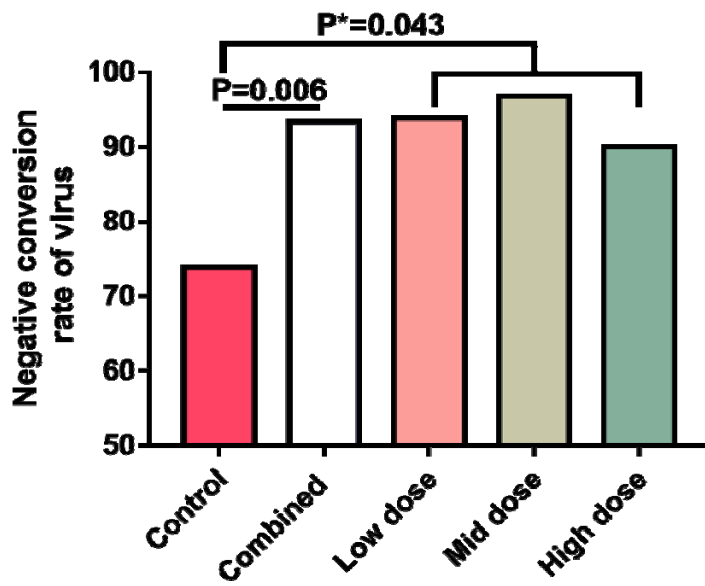

**Supplementary Figure 1. Rate of negative conversion of viral tests.** Control: standard care; Low dose: low dose of SHL; Mid dose: middle dose of SHL; High dose: high dose of SHL. \*P value trend across the SHL groups as compared with control group.

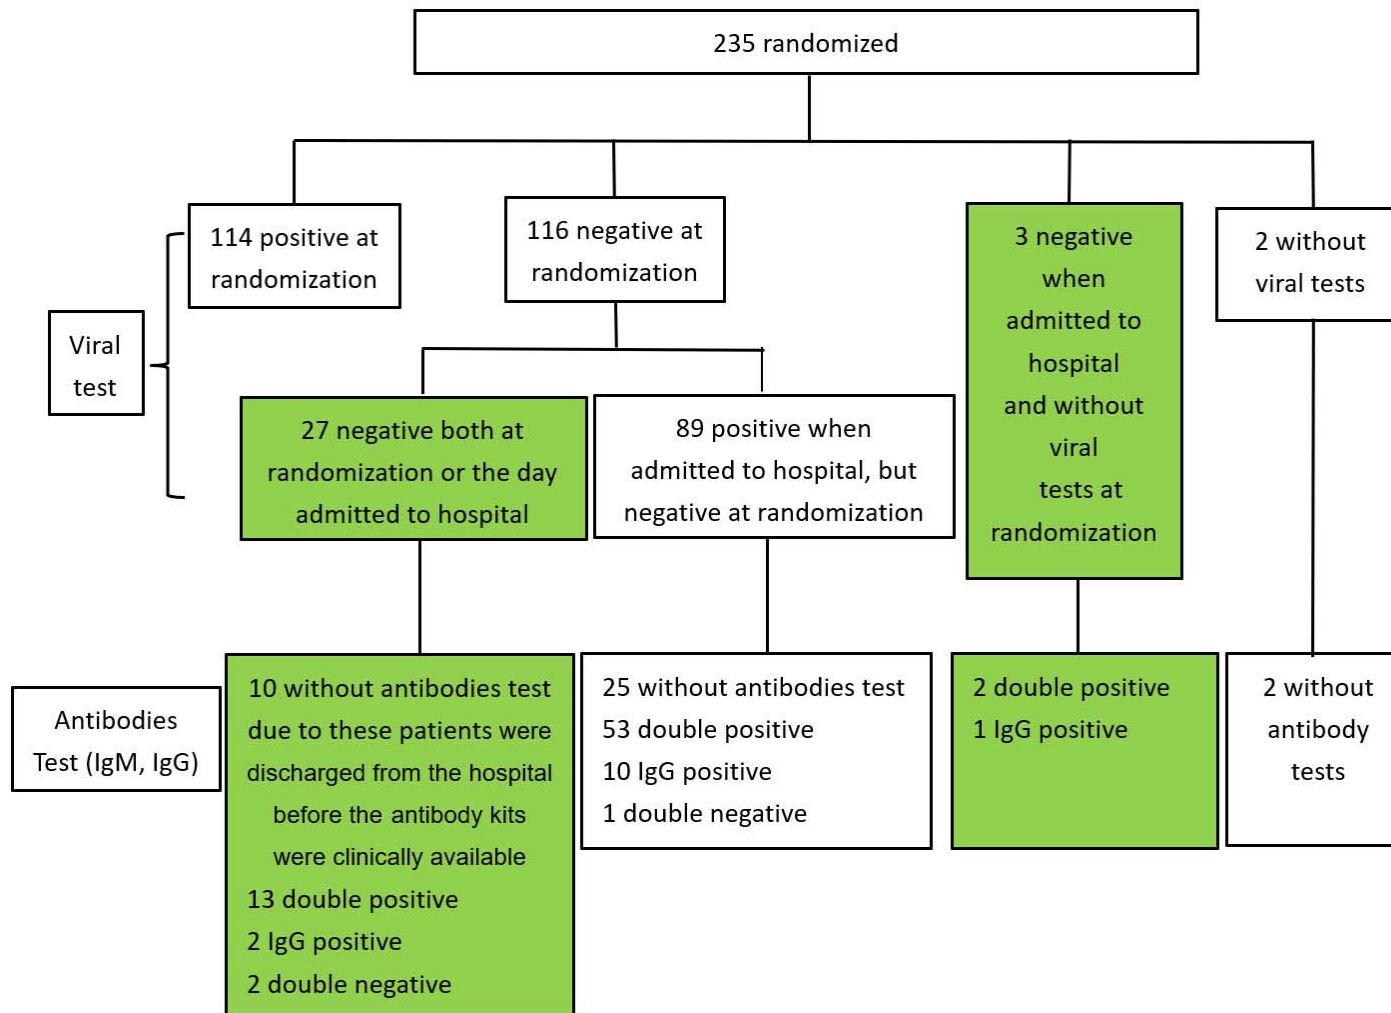

**Supplementary Figure 2. Status of nucleic acid and antibody tests and for the enrolled patients prior to the treatment.**

**Supplementary Table 1. Primary outcomes.**

|                       | Standard Care       | SHL                 |                      |                     | P value             |                   |              |
|-----------------------|---------------------|---------------------|----------------------|---------------------|---------------------|-------------------|--------------|
|                       | (N=59)              | Low dose SHL        | Middle dose SHL      | High dose SHL       | Combined            | For Trend         | For Combined |
|                       |                     | (N=56)              | (N=61)               | (N=59)              | (N=176)             | across Doses      | Dose Groups  |
|                       |                     |                     |                      |                     | vs. Standard Care   | vs. Standard Care |              |
| Recovery Time, d      | 13.00 [9.00, 19.00] | 13.00 [9.00, 20.00] | 13.00 [10.00, 20.00] | 15.00 [9.00, 22.00] | 13.00 [9.75, 20.00] | 0.986             | 0.86         |
| Hazard Ratio (95% CI) | -                   | 1.16 (0.79-1.68)    | 1.27 (0.87-1.83)     | 1.071 (0.74-1.55)   | 1.16 (0.85-1.57)    |                   |              |
| P value               | -                   | 0.866               | 0.79                 | 0.934               | 0.864               |                   |              |

Values are presented as median [interquartile range, IQR] or n (%).

**Supplementary Table 2. Criteria for scoring primary symptoms.**

| Primary symptoms | Scoring criteria                                                                                                                                                                                                                            |
|------------------|---------------------------------------------------------------------------------------------------------------------------------------------------------------------------------------------------------------------------------------------|
| Fever            | 0: body temperature $\leq 37.2^{\circ}\text{C}$<br>3: body temperature $37.3^{\circ}\text{C}\sim 37.9^{\circ}\text{C}$<br>6: body temperature $38^{\circ}\text{C}\sim 38.5^{\circ}\text{C}$<br>9: body temperature $> 38.5^{\circ}\text{C}$ |
| Fatigue          | 0: no fatigue<br>3: occasional slight fatigue<br>6: fatigue at general activity<br>9: sustaining fatigue even at rest                                                                                                                       |
| Cough            | 0: no cough<br>3: occasional cough<br>6: often cough<br>9: heavy cough all the time                                                                                                                                                         |

**Supplementary Table 3. Criteria for scoring secondary symptoms.**

| Secondary symptoms | Scoring criteria                                                                                                                                       |
|--------------------|--------------------------------------------------------------------------------------------------------------------------------------------------------|
| Diarrhea           | 0: no diarrhea<br>1: <4 times per day<br>2: 4-6 times per day<br>3: >6 times per day                                                                   |
| Nausea or vomiting | 0: no nausea or vomiting<br>1: <4 times per day<br>2: 4-6 times per day<br>3: >6 times per day                                                         |
| Feeling of cold    | 0: no feeling of cold<br>1: feeling of cold but no need to put on more clothes<br>2: feeling of cold and needing to put on more clothes<br>3: chilling |
| Chest pain         | 0: no chest pain<br>1: slight chest pain<br>2: tolerable chest pain<br>3: severe chest pain when breathing or coughing                                 |

|                     |                                                                                                                                        |
|---------------------|----------------------------------------------------------------------------------------------------------------------------------------|
| Polydipsia          | <p>0: no thirst</p> <p>1: slight thirst</p> <p>2: need drink water because of thirsty</p> <p>3: drinking water frequently</p>          |
| Hypohidrosis        | <p>0: normal sweating</p> <p>1: slight sweating</p> <p>2: abnormal sweating</p> <p>3: no sweat</p>                                     |
| Chest tightness     | <p>0: no chest tightness</p> <p>1: slight chest tightness</p> <p>2: remarkable chest tightness</p> <p>3: sense of asphyxia</p>         |
| Shortless of breath | <p>0: no shortless of breath</p> <p>1: slight shortless of breath</p> <p>2: remarkable shortless of breath</p> <p>3: out of breath</p> |

**Supplementary Table 4. Analysis of serum inflammatory factors.**

|                       | Standard Care           | SHL                     |                         |                         | P value                 |                                          |                                            |
|-----------------------|-------------------------|-------------------------|-------------------------|-------------------------|-------------------------|------------------------------------------|--------------------------------------------|
|                       |                         | Low Dose SHL            | Middle Dose SHL         | High Dose SHL           | Combined Dose Groups    | For Trend across Doses vs. Standard Care | For Combined Dose Groups vs. Standard Care |
| Day 0                 | N=43                    | N=40                    | N=40                    | N=37                    | N=117                   |                                          |                                            |
| IL-6 (pg/mL)          | 2.83 [1.71, 4.27]       | 3.27 [1.79, 10.18]      | 2.82 [1.50, 4.96]       | 3.46 [1.77, 8.33]       | 3.07 [1.66, 7.83]       | 0.519                                    | 0.391                                      |
| IL-10 (pg/mL)         | 5.00 [5.00, 5.00]       | 5.00 [5.00, 5.00]       | 5.00 [5.00, 5.00]       | 5.00 [5.00, 5.00]       | 5.00 [5.00, 5.00]       | 0.76                                     | 0.964                                      |
| IL-8 (pg/mL)          | 8.60 [6.25, 16.90]      | 9.35 [7.50, 17.47]      | 10.05 [6.30, 17.50]     | 9.40 [6.40, 21.70]      | 9.50 [6.40, 18.10]      | 0.841                                    | 0.39                                       |
| TNF- $\alpha$ (pg/mL) | 7.40 [5.45, 9.55]       | 7.40 [5.92, 9.32]       | 7.45 [5.18, 10.20]      | 7.50 [5.60, 9.80]       | 7.50 [5.50, 9.80]       | 0.998                                    | 0.934                                      |
| IL-1b (pg/mL)         | 5.00 [5.00, 6.55]       | 5.00 [5.00, 5.00]       | 5.00 [5.00, 5.00]       | 5.00 [5.00, 5.00]       | 5.00 [5.00, 5.00]       | 0.265                                    | 0.07                                       |
| IL-2R (U/mL)          | 390.00 [276.50, 520.50] | 380.50 [272.50, 533.75] | 394.50 [272.50, 529.50] | 438.00 [348.00, 635.00] | 412.00 [284.00, 562.00] | 0.434                                    | 0.404                                      |
| Day 7                 | N=15                    | N=16                    | N=18                    | N=18                    | N=52                    |                                          |                                            |
| IL-6 (pg/mL)          | 1.50 [1.50, 3.87]       | 2.94 [1.50, 8.22]       | 2.29 [1.50, 7.24]       | 2.17 [1.50, 7.11]       | 2.30 [1.50, 7.94]       | 0.677                                    | 0.263                                      |
| IL-10 (pg/mL)         | 5.00 [5.00, 5.00]       | 5.00 [5.00, 5.00]       | 5.00 [5.00, 5.00]       | 5.00 [5.00, 5.00]       | 5.00 [5.00, 5.00]       | 0.583                                    | 0.172                                      |
| IL-8 (pg/mL)          | 5.00 [5.00, 9.10]       | 8.20 [5.00, 9.75]       | 8.05 [5.00, 10.88]      | 5.45 [5.00, 8.80]       | 7.25 [5.00, 9.75]       | 0.643                                    | 0.452                                      |



|        |                       |                            |                            |                            |                            |                            |       |       |
|--------|-----------------------|----------------------------|----------------------------|----------------------------|----------------------------|----------------------------|-------|-------|
|        | TNF- $\alpha$ (pg/mL) | 6.40 [5.05, 9.25]          | 6.80 [5.87, 8.38]          | 7.15 [4.88, 9.62]          | 7.60 [5.73, 10.05]         | 7.20 [5.58, 9.65]          | 0.974 | 0.662 |
|        | IL-1b (pg/mL)         | 5.00 [5.00, 7.30]          | 5.00 [5.00, 5.00]          | 5.00 [5.00, 5.00]          | 5.00 [5.00, 5.68]          | 5.00 [5.00, 5.00]          | 0.528 | 0.264 |
|        | IL-2R (U/mL)          | 303.00 [171.00,<br>394.00] | 357.50 [287.00,<br>642.75] | 423.50 [273.00,<br>458.75] | 408.00 [195.25,<br>523.25] | 408.00 [279.00,<br>561.50] | 0.449 | 0.127 |
| Day 14 |                       | N=10                       | N=10                       | N=8                        | N=9                        | N=27                       |       |       |
|        | IL-6 (pg/mL)          | 1.96 [1.50, 2.75]          | 2.19 [1.54, 3.88]          | 1.86 [1.50, 6.86]          | 3.12 [1.50, 7.21]          | 2.19 [1.50, 6.00]          | 0.73  | 0.292 |
|        | IL-10 (pg/mL)         | 5.00 [5.00, 5.00]          | 5.00 [5.00, 5.00]          | 5.00 [5.00, 5.00]          | 5.00 [5.00, 5.00]          | 5.00 [5.00, 5.00]          | 0.875 | 0.42  |
|        | IL-8 (pg/mL)          | 14.00 [7.67, 18.38]        | 9.65 [6.20, 12.60]         | 10.10 [8.40, 11.08]        | 13.60 [10.80, 21.10]       | 10.80 [6.80,<br>14.20]     | 0.32  | 0.411 |
|        | TNF- $\alpha$ (pg/mL) | 8.95 [6.95, 10.68]         | 7.10 [4.00, 7.80]          | 8.50 [7.05, 10.57]         | 7.50 [4.00, 8.20]          | 7.45 [4.17, 9.35]          | 0.203 | 0.156 |
|        | IL-1b (pg/mL)         | 5.00 [5.00, 5.00]          | 5.00 [5.00, 5.00]          | 5.00 [5.00, 5.08]          | 5.00 [5.00, 5.00]          | 5.00 [5.00, 5.00]          | 0.898 | 0.632 |
|        | IL-2R (U/mL)          | 332.50 [255.50,<br>371.50] | 274.50 [177.75,<br>393.00] | 426.00 [239.00,<br>549.25] | 330.00 [204.00,<br>421.00] | 330.00 [190.00,<br>478.00] | 0.603 | 0.864 |

Values are presented as median [IQR]. TNF- $\alpha$ , tumor necrosis factor  $\alpha$ . IL-6, interleukin 6; IL-10, interleukin 10; IL-8, interleukin 8; IL-1b, interleukin 1 beta; IL-2R, interleukin 2 receptor.

**Supplementary Table 5. Markers of myocardial injury analysis.**

|                   | Standard Care         |                       | SHL                   |                       |                                                | Combined<br>Dose Groups | P value                                          |  |
|-------------------|-----------------------|-----------------------|-----------------------|-----------------------|------------------------------------------------|-------------------------|--------------------------------------------------|--|
|                   |                       | Low dose SHL          | Middle dose SHL       | High dose SHL         | For Trend<br>across Doses<br>vs. Standard Care |                         | For Combined<br>Dose Groups<br>vs. Standard Care |  |
| Day 0             |                       |                       |                       |                       |                                                |                         |                                                  |  |
| NT-proBNP (pg/mL) | N=35                  | N=35                  | N=38                  | N=36                  | N=109                                          |                         |                                                  |  |
|                   | 37.00 [14.00, 100.50] | 67.00 [34.00, 170.50] | 38.00 [20.00, 139.75] | 64.50 [22.00, 123.00] | 61.00 [22.00, 149.00]                          | 0.135                   | 0.066                                            |  |
| cTNI (pg/mL)      | N=38                  | N=36                  | N=41                  | N=39                  | N=116                                          |                         |                                                  |  |
|                   | 1.90 [1.90, 2.82]     | 3.45 [1.90, 5.03]     | 1.90 [1.90, 5.20]     | 2.10 [1.90, 4.75]     | 2.20 [1.90, 5.03]                              | 0.34                    | 0.144                                            |  |
| Day 7             |                       |                       |                       |                       |                                                |                         |                                                  |  |
| NT-proBNP (pg/mL) | N=24                  | N=23                  | N=22                  | N=22                  | N=67                                           |                         |                                                  |  |
|                   | 55.00 [32.75, 298.75] | 52.00 [33.50, 122.50] | 28.50 [13.25, 115.00] | 41.00 [17.50, 62.75]  | 43.00 [18.00, 116.50]                          | 0.209                   | 0.063                                            |  |
| cTNI (pg/mL)      | N=24                  | N=25                  | N=25                  | N=23                  | N=73                                           |                         |                                                  |  |
|                   | 2.00 [1.90, 2.90]     | 1.90 [1.90, 2.80]     | 1.90 [1.90, 3.30]     | 2.20 [1.90, 3.40]     | 1.90 [1.90, 3.30]                              | 0.775                   | 0.784                                            |  |
| Day 14            |                       |                       |                       |                       |                                                |                         |                                                  |  |
| NT-proBNP (pg/mL) | N=16                  | N=16                  | N=13                  | N=14                  | N=43                                           |                         |                                                  |  |
|                   | 59.00 [14.25, 114.75] | 63.50 [43.50, 139.25] | 53.00 [26.00, 94.00]  | 39.00 [19.00, 133.25] | 54.00 [21.50, 121.50]                          | 0.733                   | 0.714                                            |  |
| cTNI (pg/mL)      | N=17                  | N=18                  | N=14                  | N=14                  | N=46                                           |                         |                                                  |  |

---

|                   |                   |                   |                   |                   |      |       |
|-------------------|-------------------|-------------------|-------------------|-------------------|------|-------|
| 1.90 [1.90, 3.30] | 1.90 [1.90, 2.60] | 2.45 [1.90, 3.40] | 2.25 [1.90, 2.48] | 2.15 [1.90, 2.75] | 0.85 | 0.855 |
|-------------------|-------------------|-------------------|-------------------|-------------------|------|-------|

---

Values are presented as median [IQR]. cTnI, cardiac troponin I; NT-proBNP, N-terminal Pro-B-type natriuretic peptide.

**Supplementary Table 6. Antibodies of SARS-Cov-2 analysis.**

|                     | Standard Care           |                         | SHL                    |                         |                         | Combined<br>Dose Groups | P value                              |                                     |
|---------------------|-------------------------|-------------------------|------------------------|-------------------------|-------------------------|-------------------------|--------------------------------------|-------------------------------------|
|                     |                         |                         | Low dose SHL           | Middle dose SHL         | High dose SHL           |                         | For Trend                            | For Combined                        |
|                     |                         |                         |                        |                         |                         |                         | across Doses<br>vs. Standard<br>Care | Dose Groups<br>vs. Standard<br>Care |
| Day 0               | N=19                    | N=18                    | N=15                   | N=18                    | N=51                    |                         |                                      |                                     |
| IgM (AU/mL) (pg/mL) | 44.86 [23.32, 80.93]    | 68.92 [8.82, 165.03]    | 49.53 [19.82, 91.79]   | 33.23 [12.44, 57.14]    | 45.95 [11.39, 94.69]    | 0.539                   | 0.72                                 |                                     |
| IgG (AU/mL) (pg/mL) | 163.98 [109.75, 204.80] | 178.01 [121.34, 250.00] | 172.13 [93.41, 231.38] | 195.12 [156.37, 253.31] | 184.77 [112.90, 252.60] | 0.448                   | 0.782                                |                                     |
| Day 7               | N=19                    | N=18                    | N=15                   | N=15                    | N=48                    |                         |                                      |                                     |
| IgM (AU/mL) (pg/mL) | 33.80 [16.36, 140.84]   | 5.83 [2.29, 21.20]      | 22.11 [8.56, 59.37]    | 9.04 [3.12, 33.75]      | 10.39 [3.66, 41.18]     | 0.011                   | 0.016                                |                                     |
| IgG (AU/mL) (pg/mL) | 128.91 [81.98, 294.86]  | 95.52 [82.59, 113.62]   | 90.14 [64.15, 201.31]  | 89.49 [71.74, 132.12]   | 92.00 [70.17, 144.97]   | 0.068                   | 0.295                                |                                     |
| Day 14              | N=19                    | N=21                    | N=18                   | N=20                    | N=59                    |                         |                                      |                                     |
| IgM (AU/mL) (pg/mL) | 40.71 [11.71, 60.84]    | 28.07 [7.99, 60.64]     | 25.41 [13.87, 35.03]   | 59.70 [21.63, 135.11]   | 29.12 [10.05, 66.94]    | 0.775                   | 0.259                                |                                     |
| IgG (AU/mL) (pg/mL) | 97.54 [78.54, 175.05]   | 149.81 [90.21, 175.09]  | 146.74 [83.38, 189.64] | 149.70 [88.06, 188.00]  | 149.81 [87.54, 184.36]  | 0.228                   | 0.676                                |                                     |

Values are presented as median [IQR].

**Supplementary Table 7. Percentage of nucleic acid test negative rate at the time of enrollment in each group.**

| group       | n  | positive | without viral test report | negative | negative (percentage) |
|-------------|----|----------|---------------------------|----------|-----------------------|
| control     | 59 | 23       | 0                         | 36       | 61.0%                 |
| low dose    | 56 | 28       | 3                         | 25       | 44.6%                 |
| middle dose | 61 | 34       | 0                         | 27       | 44.3%                 |
| high dose   | 59 | 29       | 2                         | 28       | 47.5%                 |
